# Supplementary material for: Trichoderma-Induced Resistance to Botrytis cinerea in Solanum Species: A Meta-Analysis
Source: MDPI journal article supplement (doi:10.3390/plants11020180), 2022-01-11
Supplement: s1 [file s1]

**Table S1.** Database of the effects of *Trichoderma* on *Botrytis cinerea* infection and defense-related genes in tomato. Year, tomato species (Tom sp), tomato phenological stage at *B. cinerea* infection (Tom PS *Bc* I), *Trichoderma* species (*Tricho* sp), *Trichoderma* treatment type (*Tricho* TT) tomato phenological stage at *Trichoderma* treatment (Tom PS *Tricho* T), and duration of *Trichoderma* treatment (*Tricho* TD; days of treatment, DOT) and duration of *B. cinerea* infection (*Bc* ID; days of infection, DOI) used in the reviewed studies. See Appendix A for references. N.A.: not available. \*: no standard error or standard deviation were reported.

| Authors                | Year | Tom sp                                                                                                                                                             | Tom PS <i>Bc</i> I | <i>Tricho</i> sp                                | <i>Tricho</i> TT | Tom PS <i>Tricho</i> T | <i>Tricho</i> TD (DOT) | <i>Bc</i> ID (DOI) |
|------------------------|------|--------------------------------------------------------------------------------------------------------------------------------------------------------------------|--------------------|-------------------------------------------------|------------------|------------------------|------------------------|--------------------|
| Yin et al.             | 2010 | <i>S. lycopersicum</i>                                                                                                                                             | Seedling           | <i>T. harzianum</i>                             | Leaf             | Seedling               | 6-20                   | 4-7, 8-14, >14     |
| Tucci et al.*          | 2011 | <i>S. habrochaites</i> ,<br><i>S. lycopersicum</i>                                                                                                                 | Mature plant       | <i>T. atroviridae</i> ,<br><i>T. harzianum</i>  | Seed             | Sowing                 | >35                    | 0-3, 4-7           |
| Malmierca et al.       | 2012 | <i>S. lycopersicum</i>                                                                                                                                             | Mature plant       | <i>T. arundinaceum</i>                          | Seed             | Sowing                 | 21-35                  | 4-7                |
| Martínez-Medina et al. | 2013 | <i>S. lycopersicum</i>                                                                                                                                             | Mature plant       | <i>T. harzianum</i>                             | Soil             | Seedling               | 21-35                  | 4-7                |
| Cardoza et al.         | 2014 | <i>S. lycopersicum</i>                                                                                                                                             | Mature plant       | <i>T. harzianum</i>                             | Seed             | Sowing                 | 21-35                  | 4-7                |
| Fernandez et al.       | 2014 | <i>S. lycopersicum</i>                                                                                                                                             | Seedling           | <i>T. asperellum</i>                            | Soil             | Seedling               | 0-5, 6-20              | 0-3, 4-7, 8-14     |
| Harel et al.           | 2014 | <i>S. lycopersicum</i>                                                                                                                                             | Mature plant       | <i>T. harzianum</i>                             | Soil             | Mature plant           | 0-5, 6-20              | 0-3, 4-7           |
| Rubio et al.           | 2014 | <i>S. lycopersicum</i>                                                                                                                                             | Mature plant       | <i>T. parareseei</i>                            | Soil             | Mature plant           | 6-20                   | 4-7                |
| Salas-Marina et al.    | 2015 | <i>S. lycopersicum</i>                                                                                                                                             | Seedling           | <i>T. atroviridae</i> ,<br><i>T. virens</i>     | Soil             | Seedling               | 21-35                  | 8-14               |
| De Palma et al.        | 2016 | <i>S. lycopersicum</i>                                                                                                                                             | Mature plant       | <i>T. longibrachiatum</i>                       | Seed             | Sowing                 | >35                    | 0-3                |
| You et al.             | 2016 | <i>S. lycopersicum</i>                                                                                                                                             | Seedling           | <i>T. harzianum</i> ,<br><i>T. koningiopsis</i> | Leaf             | Seedling               | 6-20                   | 4-7                |
| Fernandez et al.       | 2017 | <i>S. lycopersicum</i>                                                                                                                                             | Seedling           | <i>T. asperellum</i>                            | Soil             | Seedling               | 6-20                   | 4-7, 8-14          |
| Sarrocchio et al.      | 2017 | <i>S. lycopersicum</i>                                                                                                                                             | Seedling           | <i>T. virens</i>                                | Soil             | Seedling               | 21-35                  | 8-14               |
| Herrera-Téllez et al.  | 2019 | <i>S. lycopersicum</i>                                                                                                                                             | Mature plant       | <i>T. asperellum</i>                            | Soil             | Seedling               | 21-35                  | 4-7, 8-14          |
| Jaiswal et al.         | 2020 | <i>S. chilense</i> ,<br><i>S. habrochaites</i> ,<br><i>S. lycopersicoides</i> ,<br><i>S. lycopersicum</i> ,<br><i>S. pennellii</i> ,<br><i>S. pimpinellifolium</i> | Mature plant       | <i>T. harzianum</i>                             | Soil             | Seedling               | 21-35                  | N.A.               |

**Table S2.** Details of meta-analysis on the effects of *Trichoderma* on *Botrytis cinerea* infection (i.e., disease intensity, severity and incidence) and defense-related genes involved in jasmonic (JA; i.e., proteinase inhibitors I and II, *PINI* and *PINII*, and tomato lipoxygenase A and C, *TomloxA* and *TomloxC*) and salicylic acid (SA; pathogenesis-related 1b1 and P2, *PR1b1* and *PR-P2*) pathways in tomato. For each parameter, outcomes for model results (effect size,  $r$ ; 95% confidence interval, CI; standard error, SE; and  $P$ -value) and heterogeneity (between-study variance,  $\tau^2$ ; degrees of freedom,  $df$ ; heterogeneity,  $Q$ ;  $P$ -value; and inconsistency,  $I^2$ ) are shown.

| Parameter           | Model results |                 |       |          |          | Heterogeneity |          |          |                       |  |
|---------------------|---------------|-----------------|-------|----------|----------|---------------|----------|----------|-----------------------|--|
|                     | <i>r</i>      | 95% CI          | SE    | <i>P</i> | $\tau^2$ | <i>df</i>     | <i>Q</i> | <i>P</i> | <i>I</i> <sup>2</sup> |  |
| Dis. Intensity      | -0.830        | -0.973 – -0.687 | 0.073 | <0.001   | 0.161    | 30            | 7.87E+3  | <0.001   | 99.6                  |  |
| Dis. Severity       | -0.499        | -0.582 – -0.416 | 0.042 | <0.001   | 0.129    | 73            | 1.24E+11 | <0.001   | 100.0                 |  |
| Disease Incidence   | -0.047        | -0.072 – -0.022 | 0.013 | <0.001   | 0.000    | 6             | 6.52E+1  | <0.001   | 90.8                  |  |
| <i>PINI</i> (JA)    | 0.329         | 0.043 – 0.614   | 0.146 | 0.024    | 0.680    | 31            | 8.06E+8  | <0.001   | 100.0                 |  |
| <i>PINII</i> (JA)   | 0.846         | 0.400 – 1.292   | 0.228 | <0.001   | 1.606    | 31            | 2.25E+10 | <0.001   | 100.0                 |  |
| <i>TomloxA</i> (JA) | 0.509         | 0.396 – 0.622   | 0.058 | <0.001   | 0.114    | 33            | 2.41E+9  | <0.001   | 100.0                 |  |
| <i>TomloxC</i> (JA) | 0.406         | 0.243 – 0.569   | 0.083 | <0.001   | 0.221    | 31            | 5.18E+7  | <0.001   | 100.0                 |  |
| <i>PR1b1</i> (SA)   | 0.318         | -0.184 – 0.820  | 0.256 | 0.214    | 2.162    | 32            | 1.20E+9  | <0.001   | 100.0                 |  |
| <i>PR-P2</i> (SA)   | 0.320         | -0.254 – 0.894  | 0.293 | 0.275    | 2.744    | 31            | 1.40E+9  | <0.001   | 100.0                 |  |

**Table S3.** Details of meta-regression on the effects of *Trichoderma* on *Botrytis cinerea* infection and defense-related genes in tomato. Number of observations (Obs), effect size (*r*), 95% confidence interval (CI), standard error (SE) and *P*-value are shown for each level of tomato species (Tom sp), *Trichoderma* species (*Tricho* sp), duration of *Trichoderma* treatment (*Tricho* TD; days of treatment, DOT) and duration of *B. cinerea* infection (*Bc* ID; days of infection, DOI) descriptive categories. For parameter abbreviations, see caption of Table S2.

| Category         | Level                  | Parameter           | Obs | <i>r</i> | 95% CI          | SE    | <i>P</i> |
|------------------|------------------------|---------------------|-----|----------|-----------------|-------|----------|
| Tom sp           | <i>S. habrochaites</i> | Disease Severity    | 4   | -2.506   | -2.536 – -2.475 | 0.016 | <0.001   |
|                  | <i>S. lycopersicum</i> | Disease Severity    | 64  | -0.328   | -0.417 – -0.239 | 0.045 | <0.001   |
|                  | <i>S. habrochaites</i> | <i>TomloxA</i> (JA) | 6   | 1.672    | 1.435 – 1.908   | 0.121 | <0.001   |
|                  | <i>S. lycopersicum</i> | <i>TomloxA</i> (JA) | 28  | 0.260    | -0.108 – 0.629  | 0.188 | 0.166    |
|                  | <i>S. habrochaites</i> | <i>TomloxC</i> (JA) | 6   | -0.240   | -0.583 – 0.103  | 0.175 | 0.170    |
|                  | <i>S. lycopersicum</i> | <i>TomloxC</i> (JA) | 26  | 0.550    | 0.384 – 0.727   | 0.088 | <0.001   |
| <i>Tricho</i> sp | <i>T. asperellum</i>   | Disease Severity    | 8   | -0.388   | -0.517 – -0.260 | 0.066 | <0.001   |
|                  | <i>T. atroviridae</i>  | Disease Severity    | 11  | -0.885   | -1.127 – -0.643 | 0.123 | <0.001   |
|                  | <i>T. harzianum</i>    | Disease. Severity   | 52  | -0.353   | -0.420 – -0.287 | 0.034 | <0.001   |
|                  | <i>T. virens</i>       | Disease Severity    | 2   | -4.533   | -7.743 – -1.324 | 1.637 | 0.006    |
| <i>Tricho</i> TD | 21-35 DOT              | <i>PINII</i> (JA)   | 6   | 2.739    | 2.044 – 3.434   | 0.355 | <0.001   |
|                  | >35 DOT                | <i>PINII</i> (JA)   | 24  | 0.596    | 0.089 – 1.103   | 0.259 | 0.021    |
|                  | 21-35 DOT              | <i>PR1b1</i> (SA)   | 2   | 3.252    | 1.453 – 5.502   | 0.918 | <0.001   |
|                  | >35 DOT                | <i>PR1b1</i> (SA)   | 31  | 0.129    | -0.146 – 0.404  | 0.140 | 0.357    |
|                  | 21-35 DOT              | <i>PR-P2</i> (SA)   | 2   | 3.270    | 1.324 – 5.215   | 0.993 | <0.001   |
|                  | >35 DOT                | <i>PR-P2</i> (SA)   | 31  | 0.123    | -0.248 – 0.494  | 0.189 | 0.516    |
| <i>Bc</i> ID     | 4-7 DOI                | Disease Intensity   | 14  | -0.955   | -1.198 – -0.712 | 0.124 | <0.001   |
|                  | 8-14 DOI               | Disease Intensity   | 9   | -0.760   | -0.880 – -0.632 | 0.065 | <0.001   |
|                  | >14 DOI                | Disease Intensity   | 8   | -0.699   | -0.849 – -0.548 | 0.077 | <0.001   |
|                  | 0-3 DOI                | <i>PINII</i> (JA)   | 26  | 0.492    | 0.005 – 0.979   | 0.249 | 0.048    |
|                  | 4-7 DOI                | <i>PINII</i> (JA)   | 6   | 2.739    | 2.044 – 3.434   | 0.355 | <0.001   |
|                  | 0-3 DOI                | <i>PR1b1</i> (SA)   | 31  | 0.129    | -0.146 – 0.404  | 0.140 | 0.357    |
|                  | 4-7 DOI                | <i>PR1b1</i> (SA)   | 2   | 3.252    | 1.453 – 5.052   | 0.918 | <0.001   |
|                  | 0-3 DOI                | <i>PR-P2</i> (SA)   | 30  | 0.123    | -0.248 – 0.494  | 0.189 | 0.516    |
|                  | 4-7 DOI                | <i>PR-P2</i> (SA)   | 2   | 3.270    | 1.324 – 5.215   | 0.993 | <0.001   |
|                  |                        |                     |     |          |                 |       |          |

**Table S4.** Numbers of observations (O) and studies (S) within levels of tomato species (*S. chilense*, *S. habrochaites*, *S. lycopersicoides*, *S. lycopersicum*, *S. pennellii*, *S. pimpinellifolium*) descriptive category. Parameters completely excluded from meta-regression are highlighted in yellow, whereas levels excluded from this analysis are reported in red. For parameter abbreviations, see caption of Table S2.

| Parameter           | All |    | Tomato species     |   |                        |   |                           |   |                        |    |                     |   |                            |   |
|---------------------|-----|----|--------------------|---|------------------------|---|---------------------------|---|------------------------|----|---------------------|---|----------------------------|---|
|                     |     |    | <i>S. chilense</i> |   | <i>S. habrochaites</i> |   | <i>S. lycopersicoides</i> |   | <i>S. lycopersicum</i> |    | <i>S. pennellii</i> |   | <i>S. pimpinellifolium</i> |   |
|                     | O   | S  | O                  | S | O                      | S | O                         | S | O                      | S  | O                   | S | O                          | S |
| Disease Intensity   | 31  | 4  | 0                  | 0 | 0                      | 0 | 0                         | 0 | 31                     | 4  | 0                   | 0 | 0                          | 0 |
| Disease Severity    | 74  | 11 | 1                  | 1 | 4                      | 2 | 1                         | 1 | 64                     | 10 | 2                   | 1 | 2                          | 1 |
| Disease Incidence   | 7   | 2  | 0                  | 0 | 0                      | 0 | 0                         | 0 | 7                      | 2  | 0                   | 0 | 0                          | 0 |
| <i>PINI</i> (JA)    | 32  | 3  | 0                  | 0 | 6                      | 1 | 0                         | 0 | 26                     | 3  | 0                   | 0 | 0                          | 0 |
| <i>PINII</i> (JA)   | 32  | 5  | 0                  | 0 | 0                      | 0 | 0                         | 0 | 32                     | 5  | 0                   | 0 | 0                          | 0 |
| <i>TomloxA</i> (JA) | 34  | 4  | 0                  | 0 | 6                      | 1 | 0                         | 0 | 28                     | 4  | 0                   | 0 | 0                          | 0 |
| <i>TomloxC</i> (JA) | 32  | 2  | 0                  | 0 | 6                      | 1 | 0                         | 0 | 26                     | 2  | 0                   | 0 | 0                          | 0 |
| <i>PR1b1</i> (SA)   | 33  | 4  | 0                  | 0 | 6                      | 1 | 0                         | 0 | 27                     | 4  | 0                   | 0 | 0                          | 0 |
| <i>PR-P2</i> (SA)   | 32  | 3  | 0                  | 0 | 6                      | 1 | 0                         | 0 | 26                     | 3  | 0                   | 0 | 0                          | 0 |

**Table S5.** Numbers of observations (O) and studies (S) within levels of tomato phenological stage at *Botrytis cinerea* infection (seedling, mature plant) descriptive category. Parameters completely excluded from meta-regression are highlighted in yellow, whereas levels excluded from this analysis are reported in red. For parameter abbreviations, see caption of Table S2.

| Parameter           | All |    | Tomato phenological stage at <i>Botrytis cinerea</i> infection |   |              |   |
|---------------------|-----|----|----------------------------------------------------------------|---|--------------|---|
|                     | O   | S  | Seedling                                                       |   | Mature plant |   |
|                     | O   | S  | O                                                              | S | O            | S |
| Disease Intensity   | 31  | 4  | 29                                                             | 3 | 2            | 1 |
| Disease Severity    | 74  | 11 | 46                                                             | 7 | 9            | 2 |
| Disease Incidence   | 7   | 2  | 7                                                              | 2 | 0            | 0 |
| <i>PINI</i> (JA)    | 32  | 3  | 0                                                              | 0 | 0            | 0 |
| <i>PINII</i> (JA)   | 32  | 5  | 4                                                              | 1 | 2            | 1 |
| <i>TomloxA</i> (JA) | 34  | 4  | 0                                                              | 0 | 2            | 1 |
| <i>TomloxC</i> (JA) | 32  | 2  | 0                                                              | 0 | 2            | 1 |
| <i>PR1b1</i> (SA)   | 33  | 4  | 0                                                              | 0 | 0            | 0 |
| <i>PR-P2</i> (SA)   | 32  | 3  | 0                                                              | 0 | 0            | 0 |

**Table S6.** Numbers of observations (O) and studies (S) within levels of *Trichoderma* species (*T. arundinaceum*, *T. asperellum*, *T. atroviride*, *T. harzianum*, *T. koningiopsis*, *T. longibrachiatum*, *T. parareseei*, *T. virens*) descriptive categoriy. Parameters completely excluded from meta-regression are highlighted in yellow, whereas levels excluded from this analysis are reported in red. For parameter abbreviations, see caption of Table S2.

| Parameter           | All |    | <i>Trichoderma</i> species |   |                      |   |                      |   |                     |   |                        |   |                           |   |                      |   |                  |   |
|---------------------|-----|----|----------------------------|---|----------------------|---|----------------------|---|---------------------|---|------------------------|---|---------------------------|---|----------------------|---|------------------|---|
|                     |     |    | <i>T. arundinaceum</i>     |   | <i>T. asperellum</i> |   | <i>T. atroviride</i> |   | <i>T. harzianum</i> |   | <i>T. koningiopsis</i> |   | <i>T. longibrachiatum</i> |   | <i>T. parareseei</i> |   | <i>T. virens</i> |   |
|                     | O   | S  | O                          | S | O                    | S | O                    | S | O                   | S | O                      | S | O                         | S | O                    | S | O                | S |
| Disease Intensity   | 31  | 4  | 0                          | 0 | 1                    | 1 | 0                    | 0 | 28                  | 3 | 2                      | 1 | 0                         | 0 | 0                    | 0 | 0                | 0 |
| Disease Severity    | 74  | 11 | 0                          | 0 | 8                    | 3 | 11                   | 2 | 52                  | 4 | 0                      | 0 | 0                         | 0 | 1                    | 1 | 2                | 2 |
| Disease Incidence   | 7   | 2  | 0                          | 0 | 3                    | 1 | 0                    | 0 | 2                   | 1 | 2                      | 1 | 0                         | 0 | 0                    | 0 | 0                | 0 |
| <i>PINI</i> (JA)    | 32  | 3  | 1                          | 1 | 0                    | 0 | 15                   | 1 | 16                  | 2 | 0                      | 0 | 0                         | 0 | 0                    | 0 | 0                | 0 |
| <i>PINII</i> (JA)   | 32  | 5  | 1                          | 1 | 0                    | 0 | 12                   | 1 | 19                  | 4 | 0                      | 0 | 0                         | 0 | 0                    | 0 | 0                | 0 |
| <i>TomloxA</i> (JA) | 34  | 4  | 1                          | 1 | 0                    | 0 | 15                   | 1 | 18                  | 3 | 0                      | 0 | 0                         | 0 | 0                    | 0 | 0                | 0 |
| <i>TomloxC</i> (JA) | 32  | 2  | 0                          | 0 | 0                    | 0 | 15                   | 1 | 17                  | 2 | 0                      | 0 | 0                         | 0 | 0                    | 0 | 0                | 0 |
| <i>PR1b1</i> (SA)   | 33  | 4  | 1                          | 1 | 0                    | 0 | 15                   | 1 | 16                  | 2 | 0                      | 0 | 1                         | 1 | 0                    | 0 | 0                | 0 |
| <i>PR-P2</i> (SA)   | 32  | 3  | 1                          | 1 | 0                    | 0 | 15                   | 1 | 16                  | 2 | 0                      | 0 | 0                         | 0 | 0                    | 0 | 0                | 0 |

**Table S7.** Numbers of observations (O) and studies (S) within levels of *Trichoderma* treatment type (seed, soil, leaf) descriptive category. Parameters completely excluded from meta-regression are highlighted in yellow, whereas levels excluded from this analysis are reported in red. For parameter abbreviations, see caption of Table S2.

| Parameter           | All |    | <i>Trichoderma</i> treatment type |   |      |   |      |   |
|---------------------|-----|----|-----------------------------------|---|------|---|------|---|
|                     |     |    | Seed                              |   | Soil |   | Leaf |   |
|                     | O   | S  | O                                 | S | O    | S | O    | S |
| Disease Intensity   | 31  | 4  | 0                                 | 0 | 3    | 1 | 28   | 2 |
| Disease Severity    | 74  | 11 | 19                                | 1 | 55   | 9 | 0    | 0 |
| Disease Incidence   | 7   | 2  | 0                                 | 0 | 3    | 1 | 4    | 1 |
| <i>PINI</i> (JA)    | 32  | 3  | 32                                | 3 | 0    | 0 | 0    | 0 |
| <i>PINII</i> (JA)   | 32  | 5  | 26                                | 3 | 6    | 2 | 0    | 0 |
| <i>TomloxA</i> (JA) | 34  | 4  | 32                                | 3 | 2    | 1 | 0    | 0 |
| <i>TomloxC</i> (JA) | 32  | 2  | 30                                | 1 | 2    | 1 | 0    | 0 |
| <i>PR1b1</i> (SA)   | 33  | 4  | 33                                | 4 | 0    | 0 | 0    | 0 |
| <i>PR-P2</i> (SA)   | 32  | 3  | 32                                | 3 | 0    | 0 | 0    | 0 |

**Table S8.** Numbers of observations (O) and studies (S) within levels of tomato phenological stage at *Trichoderma* treatment (sowing, seedling, mature plant) descriptive category. Parameters completely excluded from meta-regression are highlighted in yellow, whereas levels excluded from this analysis are reported in red. For parameter abbreviations, see caption of Table S2.

| Parameter           | All |    | Tomato phenological stage at <i>Trichoderma</i> treatment |   |          |   |              |   |
|---------------------|-----|----|-----------------------------------------------------------|---|----------|---|--------------|---|
|                     | O   | S  | Sowing                                                    |   | Seedling |   | Mature plant |   |
|                     | O   | S  | O                                                         | S | O        | S | O            | S |
| Disease Intensity   | 31  | 4  | 0                                                         | 0 | 29       | 3 | 2            | 1 |
| Disease Severity    | 74  | 11 | 19                                                        | 1 | 46       | 7 | 9            | 2 |
| Disease Incidence   | 7   | 2  | 0                                                         | 0 | 7        | 2 | 0            | 0 |
| <i>PINI</i> (JA)    | 32  | 3  | 32                                                        | 3 | 0        | 0 | 0            | 0 |
| <i>PINII</i> (JA)   | 32  | 5  | 26                                                        | 3 | 4        | 1 | 2            | 1 |
| <i>TomloxA</i> (JA) | 34  | 4  | 32                                                        | 3 | 0        | 0 | 2            | 1 |
| <i>TomloxC</i> (JA) | 32  | 2  | 30                                                        | 1 | 0        | 0 | 2            | 1 |
| <i>PR1b1</i> (SA)   | 33  | 4  | 33                                                        | 4 | 0        | 0 | 0            | 0 |
| <i>PR-P2</i> (SA)   | 32  | 3  | 32                                                        | 3 | 0        | 0 | 0            | 0 |



**Table S9.** Numbers of observations (O) and studies (S) within levels of duration of *Trichoderma* treatment (0-5, 6-20, 21-35, >35 days of treatment, DOT) descriptive category. Parameters completely excluded from meta-regression are highlighted in yellow, whereas levels excluded from this analysis are reported in red. For parameter abbreviations, see caption of Table S2.

| Parameter           | All |    | Duration of <i>Trichoderma</i> treatment |   |          |   |           |   |         |   |
|---------------------|-----|----|------------------------------------------|---|----------|---|-----------|---|---------|---|
|                     |     |    | 0-5 DOT                                  |   | 6-20 DOT |   | 21-35 DOT |   | >35 DOT |   |
|                     | O   | S  | O                                        | S | O        | S | O         | S | O       | S |
| Disease Intensity   | 31  | 4  | 0                                        | 0 | 31       | 4 | 0         | 0 | 0       | 0 |
| Disease Severity    | 74  | 11 | 0                                        | 0 | 15       | 4 | 40        | 5 | 19      | 1 |
| Disease Incidence   | 7   | 2  | 0                                        | 0 | 7        | 2 | 0         | 0 | 0       | 0 |
| <i>PINI</i> (JA)    | 32  | 3  | 0                                        | 0 | 0        | 0 | 2         | 2 | 30      | 1 |
| <i>PINII</i> (JA)   | 32  | 5  | 2                                        | 1 | 0        | 0 | 6         | 3 | 24      | 1 |
| <i>TomloxA</i> (JA) | 34  | 4  | 2                                        | 1 | 0        | 0 | 2         | 2 | 30      | 1 |
| <i>TomloxC</i> (JA) | 32  | 2  | 2                                        | 1 | 0        | 0 | 0         | 0 | 30      | 1 |
| <i>PR1b1</i> (SA)   | 33  | 4  | 0                                        | 0 | 0        | 0 | 2         | 2 | 31      | 1 |
| <i>PR-P2</i> (SA)   | 32  | 3  | 0                                        | 0 | 0        | 0 | 2         | 2 | 30      | 1 |

**Table S10.** Numbers of observations (O) and studies (S) within levels of duration of *Botrytis cinerea* infection (0-3, 4-7, 8-14, >14 days of infection, DOI) descriptive category. Parameters completely excluded from meta-regression are highlighted in yellow, whereas levels excluded from this analysis are reported in red. N.A.: not available (thus excluded from meta-regression). For parameter abbreviations, see caption of Table S2.

| Parameter           | All |    | Duration of <i>Botrytis cinerea</i> infection |   |         |   |          |   |         |   |    |   | N.A. |   |
|---------------------|-----|----|-----------------------------------------------|---|---------|---|----------|---|---------|---|----|---|------|---|
|                     |     |    | 0-3 DOI                                       |   | 4-7 DOI |   | 8-14 DOI |   | >14 DOI |   |    |   |      |   |
|                     | O   | S  | O                                             | S | O       | S | O        | S | O       | S | O  | S | O    | S |
| Disease Intensity   | 31  | 4  | 0                                             | 0 | 14      | 3 | 9        | 2 | 8       | 1 | 0  | 0 | 0    | 0 |
| Disease Severity    | 74  | 11 | 11                                            | 2 | 30      | 7 | 8        | 5 | 0       | 0 | 25 | 1 | 0    | 0 |
| Disease Incidence   | 7   | 2  | 0                                             | 0 | 5       | 2 | 2        | 1 | 0       | 0 | 0  | 0 | 0    | 0 |
| <i>PINI</i> (JA)    | 32  | 3  | 30                                            | 1 | 2       | 2 | 0        | 0 | 0       | 0 | 0  | 0 | 0    | 0 |
| <i>PINII</i> (JA)   | 32  | 5  | 26                                            | 2 | 6       | 3 | 0        | 0 | 0       | 0 | 0  | 0 | 0    | 0 |
| <i>TomloxA</i> (JA) | 34  | 4  | 32                                            | 2 | 2       | 2 | 0        | 0 | 0       | 0 | 0  | 0 | 0    | 0 |
| <i>TomloxC</i> (JA) | 32  | 2  | 32                                            | 2 | 0       | 0 | 0        | 0 | 0       | 0 | 0  | 0 | 0    | 0 |
| <i>PR1b1</i> (SA)   | 33  | 4  | 31                                            | 2 | 2       | 2 | 0        | 0 | 0       | 0 | 0  | 0 | 0    | 0 |
| <i>PR-P2</i> (SA)   | 32  | 3  | 30                                            | 1 | 2       | 2 | 0        | 0 | 0       | 0 | 0  | 0 | 0    | 0 |
